# Supplementary material for: Interpenetrating gels as conducting/adhering matrices enabling high-performance silicon anodes
Source: Royal Society of Chemistry journal article supplement (doi:10.1039/d1ta01733k), 2021-01-01
Supplement: d1ta01733k1.pdf [file d1ta01733k1.pdf]

## Supplementary Information

### Interpenetrating Gels as Conducting/Adhering Matrices Enabling High- Performance Silicon Anodes

Tingting Xia,<sup>§</sup> Chengfei Xu,<sup>§</sup> Pengfei Dai, Xiaoyun Li, Riming Lin, Yawen Tang, Yiming Zhou and Ping Wu\*

Jiangsu Key Laboratory of New Power Batteries, Jiangsu Collaborative Innovation Center of Biomedical  
Functional Materials, School of Chemistry and Materials Science, Nanjing Normal University, Nanjing  
210023 (China)

\*E-mail: [zjuwuping@njnu.edu.cn](mailto:zjuwuping@njnu.edu.cn) (P.W.).

<sup>§</sup> These authors contributed equally to this work.

## EXPERIMENTAL SECTION

**Chemicals and materials.** Polyvinyl alcohol (PVA, degree of polymerization,  $1750 \pm 50$ ), glutaraldehyde (GA, 50% aqueous solution), pyrrole, ammonium persulfate (APS), and copper phthalocyanine-3,4',4'',4'''-tetrasulfonic acid tetrasodium salt (CuPcTs) were bought from Sigma-Aldrich. Commercial Si particle (average size of  $\sim 50$  nm) was obtained from Alfa Aesar.

**Synthesis of the PPy/PVA interpenetrating gel.** In a typical synthesis, 1 mL 25% GA aqueous solution, 152  $\mu$ L pyrrole, and 3 mg CuPcTs were added and dissolved in 10 mL 2 wt% PVA aqueous solution. Then, 3 mL 1 M APS aqueous solution was added into the above solution, and the reaction system was carried out for 2 h. Subsequently, the obtained gel was immersed into deionized water to remove unreacted and generated ions, yielding the PPy/PVA interpenetrating hydrogel. The PPy/PVA hydrogel was further freeze-dried to obtain PPy/PVA interpenetrating aerogel.

**Synthesis of the Si@PPy/PVA gel electrode.** For the electrode preparation, 0.6 g commercial Si particle was added to the gel precursor solution and *in situ* immobilized within the PPy/PVA interpenetrating gel during the gelation processes. Subsequently, the as-prepared Si@PPy/PVA hybrid gel was spread on copper foil current collectors, and then the electrode foil was immersed into deionized water to remove unreacted/generated ions and then dried in a vacuum oven at 90 °C for 12 h.

**Characterization.** The crystalline phases and crystallinity of the as-prepared samples were examined by X-ray powder diffraction (XRD) with a Cu K $\alpha$  radiation (Rigaku D/max 2500/PC). The morphology and microstructure of the products were investigated by scanning electron microscope (SEM, JSM-5610LV), and high-resolution transmission electron microscopy (HRTEM, JEOL JEM-2010F, 200 kV) accompanied by energy-dispersive X-ray spectrometer (EDS, Thermo Fisher Scientific). Fourier transform infrared (FTIR) spectroscopy was conducted by a Bruker Tensor 27

spectrometer. Nitrogen adsorption/desorption tests were performed using a Micromeritics ASAP 2460 analyzer, and Brunauer-Emmett-Teller (BET) and Barrett-Joyner-Halenda (BJH) methods were used to measure surface area, pore volume, and pore size, respectively. Thermogravimetric analysis (TGA) was conducted on a thermal analyzer (NETZSCH STA) at a heating rate of 10 °C min<sup>-1</sup> under air atmosphere.

**Electrochemical measurement.** The electrochemical performances toward lithium storage were tested using CR2025 coin cells, which were assembled in an Innovative Technology glove box (IL-2GB). The as-obtained Si@PPy/PVA gel electrode was used as working electrode, and as a control sample, the conventional electrode was prepared by spreading aqueous slurry, containing 70 wt% commercial Si particle, 15 wt% carbon black (CB), and 15 wt% sodium carboxymethyl-cellulose (CMC), on copper foils. Only silicon component was considered as active material when calculating the specific capacities of the gel electrode and conventional electrode. The counter/reference electrode was lithium foil, and the electrolyte was 1 M LiPF<sub>6</sub> in ethylene carbonate and dimethyl carbonate (1:1 in volume) containing 5 vol% fluoroethylene carbonate. The charge/discharge behaviors of the gel electrode and conventional electrode were investigated using a LANHE CT2001A battery tester (0.01-1.2 V, 0.1 A g<sup>-1</sup> in the first cycle and 0.5 to 5 A g<sup>-1</sup> in subsequent cycles).

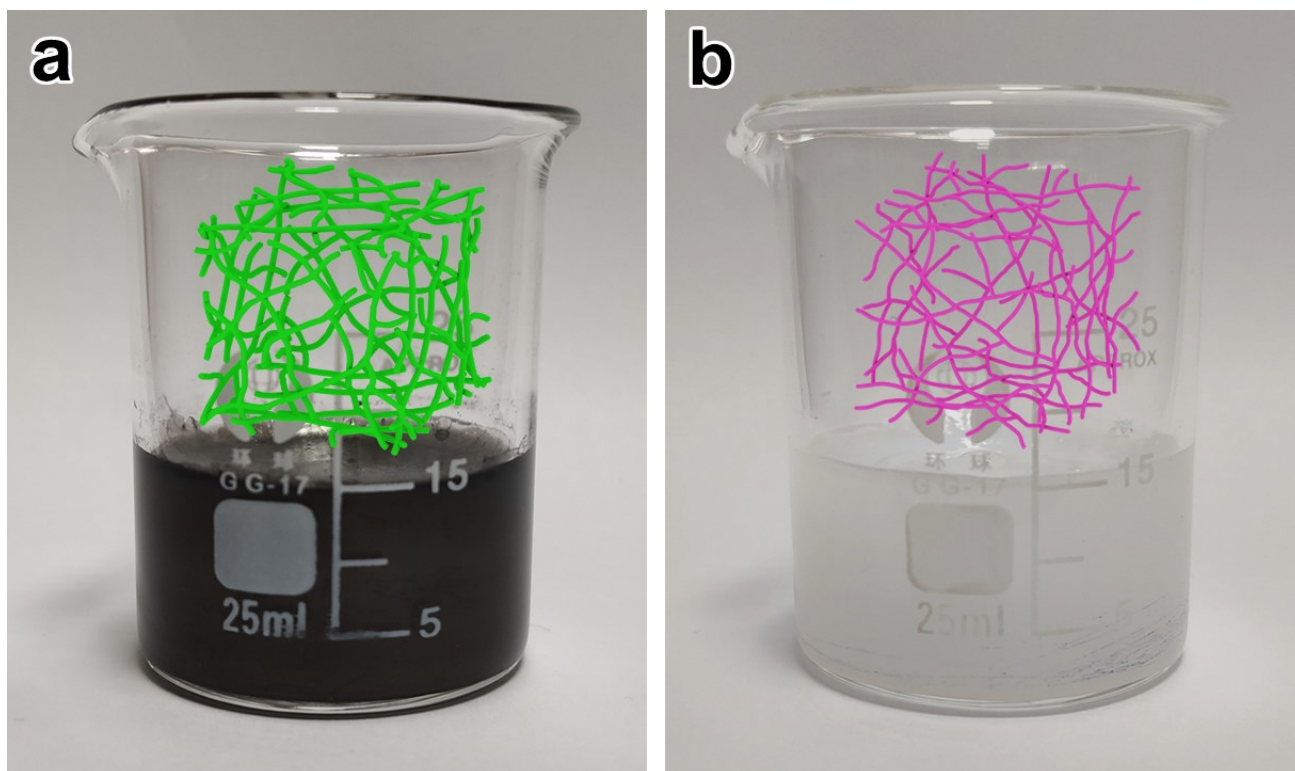

**Fig. S1** Photographs of the PPy hydrogel (a), PVA hydrogel (b), and their corresponding models (insets).

Synthesis of the PPy hydrogel: 152  $\mu\text{L}$  pyrrole and 3 mg CuPcTs were dissolved in 11 mL deionized water. Then, 3 mL 1 M APS aqueous solution was added into the above solution, yielding the PPy hydrogel.

Synthesis of the PVA hydrogel: 1 mL 25% GA aqueous solution were added in 10 mL 2 wt% PVA aqueous solution. Then, 3 mL 1.5 M HCl aqueous solution was added into the above solution, yielding the PVA hydrogel.

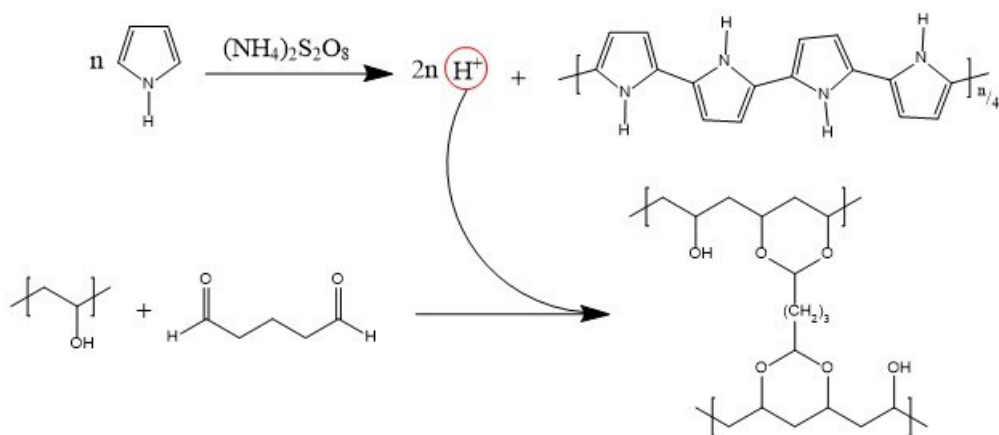

**Fig. S2** The detailed reaction equations for the simultaneous and correlative gelation reactions of the PPy/PVA interpenetrating gel.

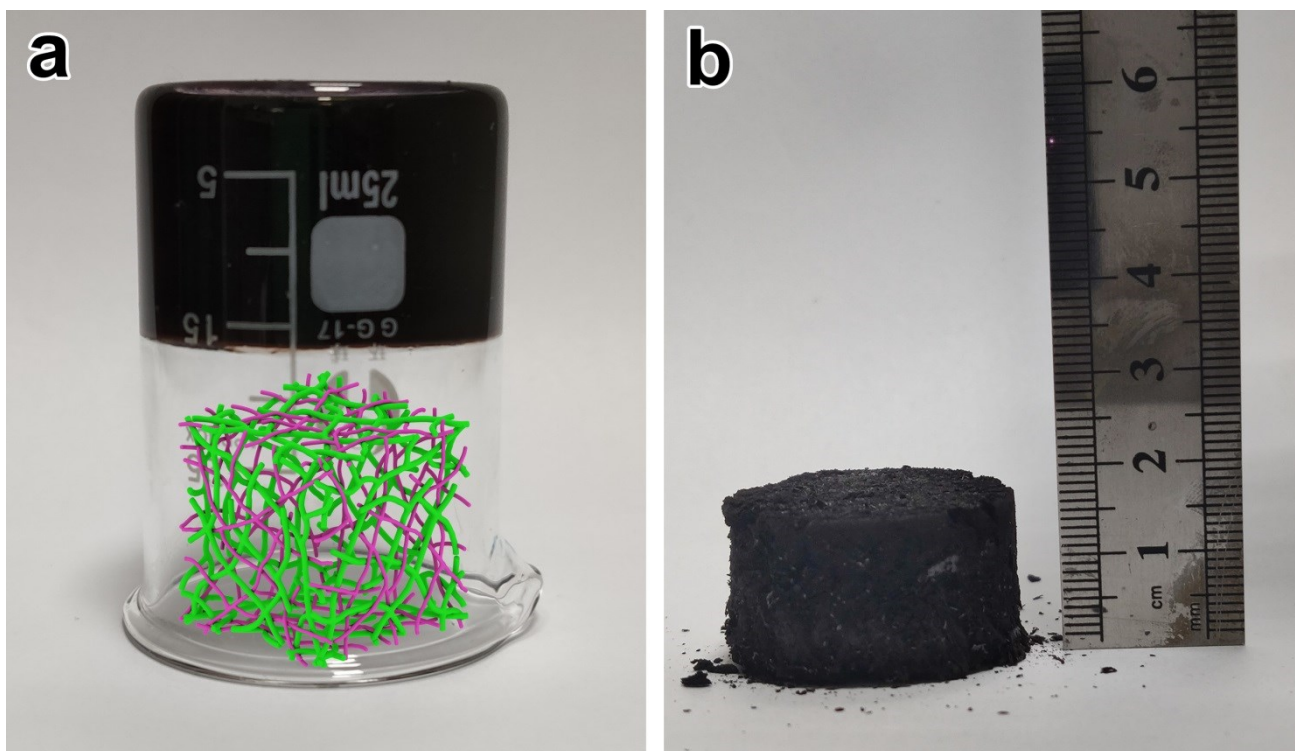

**Fig. S3** Photographs of the PPy/PVA interpenetrating hydrogel (a) and aerogel (b).

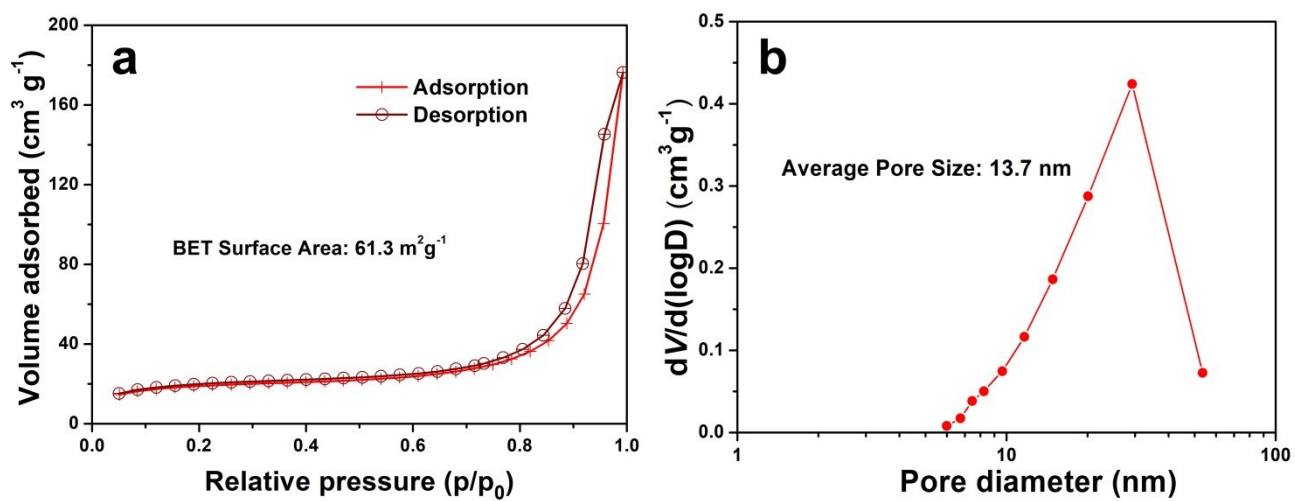

**Fig. S4** Nitrogen adsorption/desorption isotherms (a) and pore size distribution (b) of the PPy/PVA interpenetrating gel.

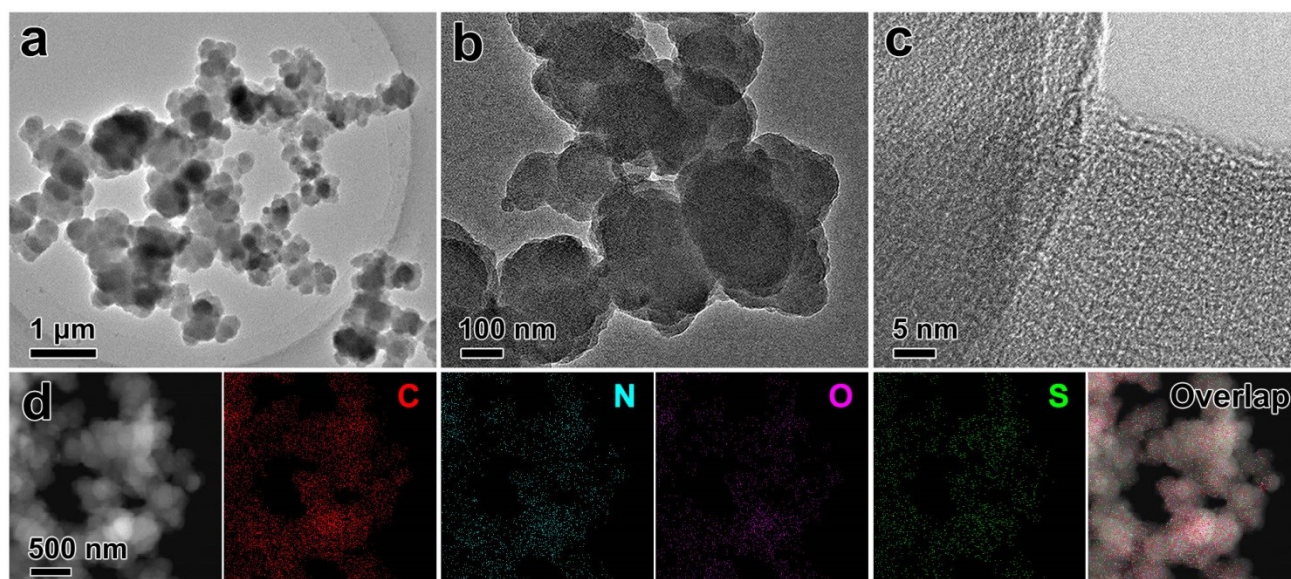

**Fig. S5** (a-c) TEM images and (d) STEM-EDS elemental mappings of the PPy gel.



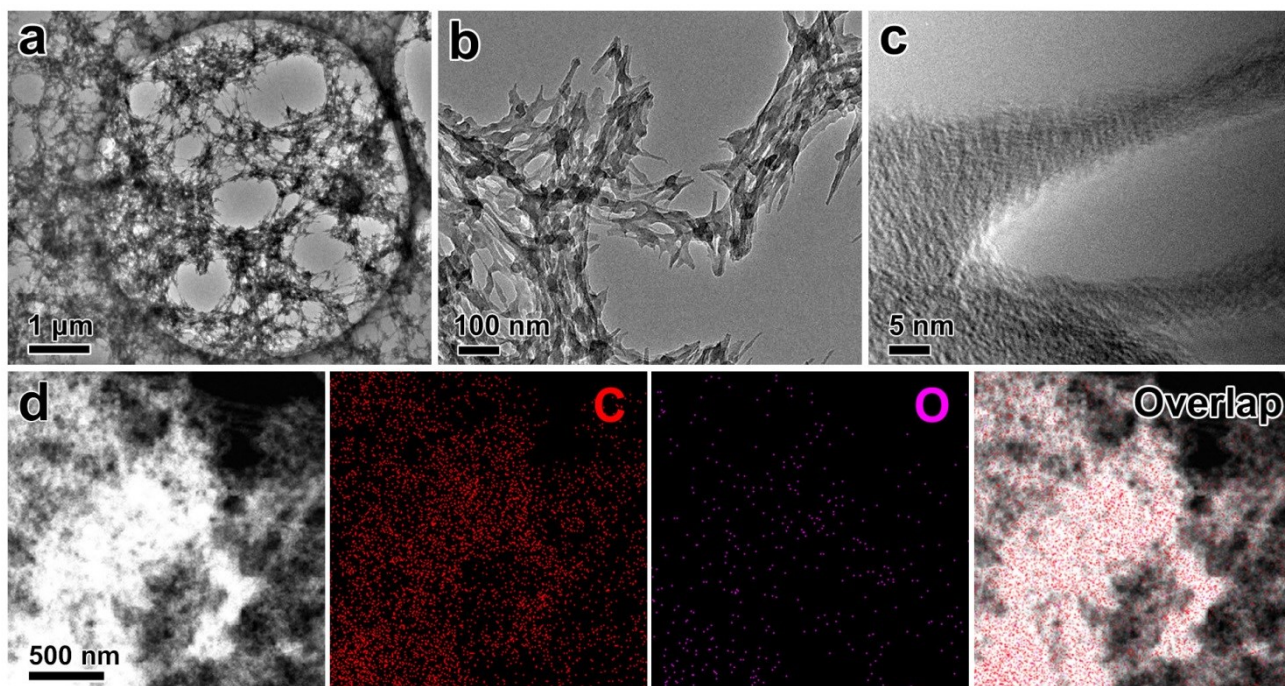

**Fig. S6** (a-c) TEM images and (d) STEM-EDS elemental mappings of the PVA gel.

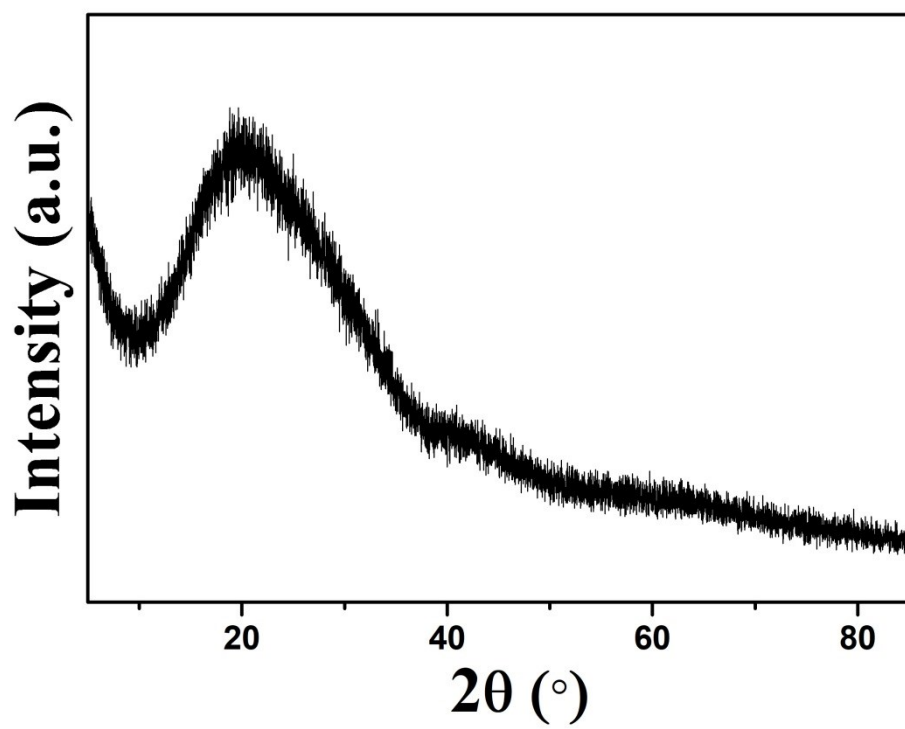

**Fig. S7** XRD pattern of the the PPy/PVA interpenetrating gel.

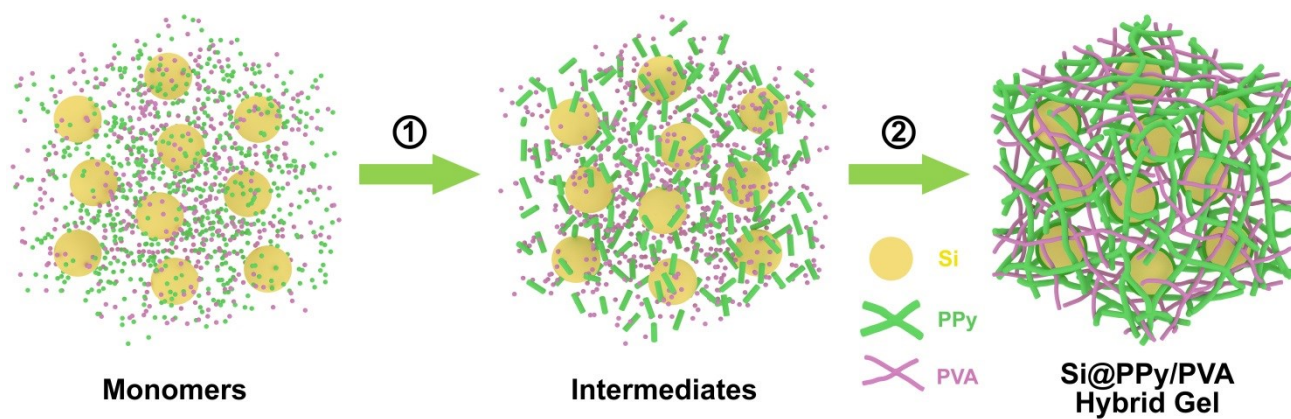

**Fig. S8** Synthetic diagram of the Si@PPy/PVA hybrid gel.

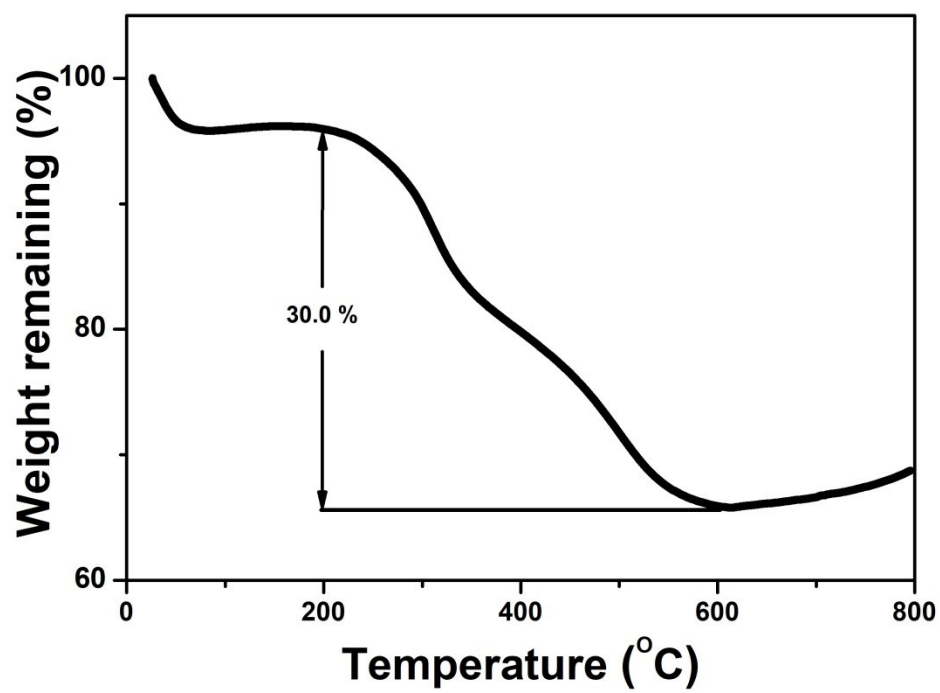

**Fig. S9** TGA curve of the Si@PPy/PVA hybrid gel.

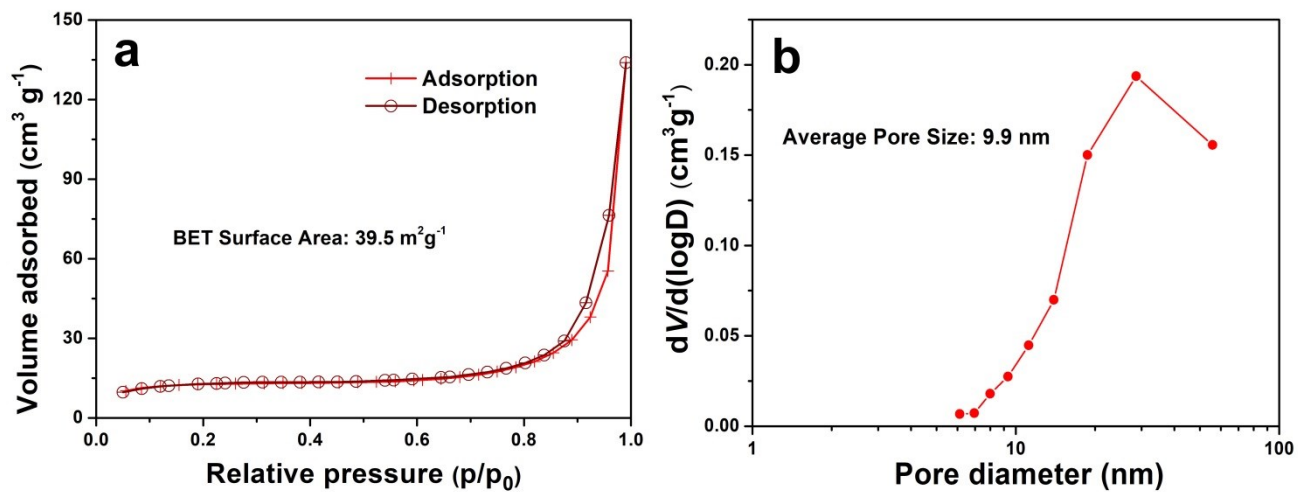

**Fig. S10** Nitrogen adsorption/desorption isotherms (a) and pore size distribution (b) of the Si@PPy/PVA hybrid gel.

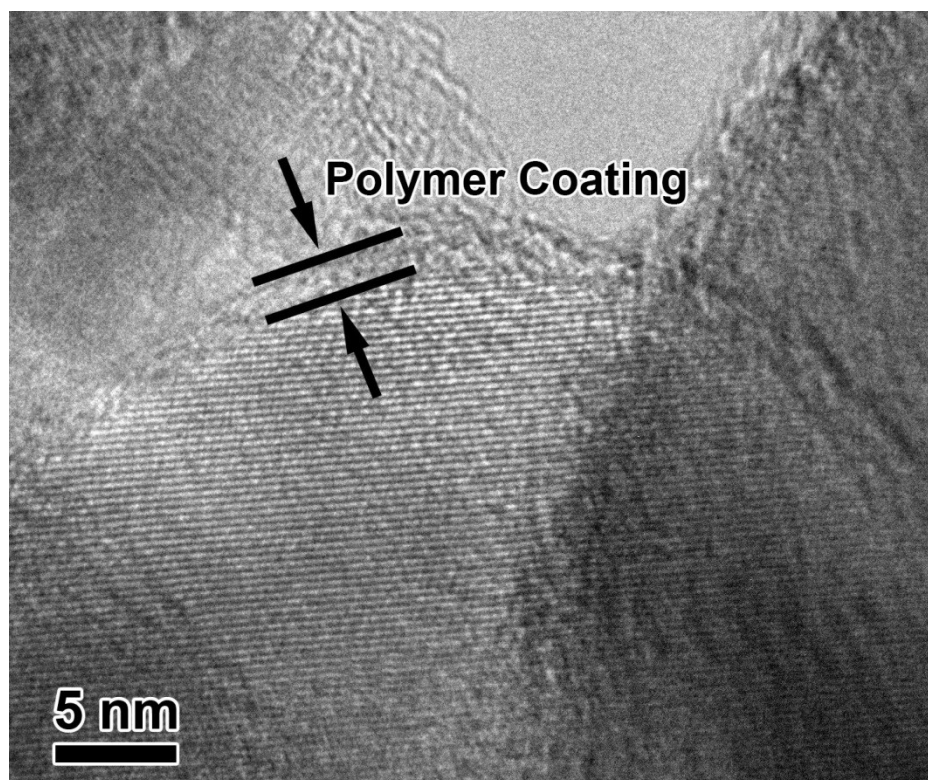

**Fig. S11** HRTEM image of the Si@PPy/PVA hybrid gel.

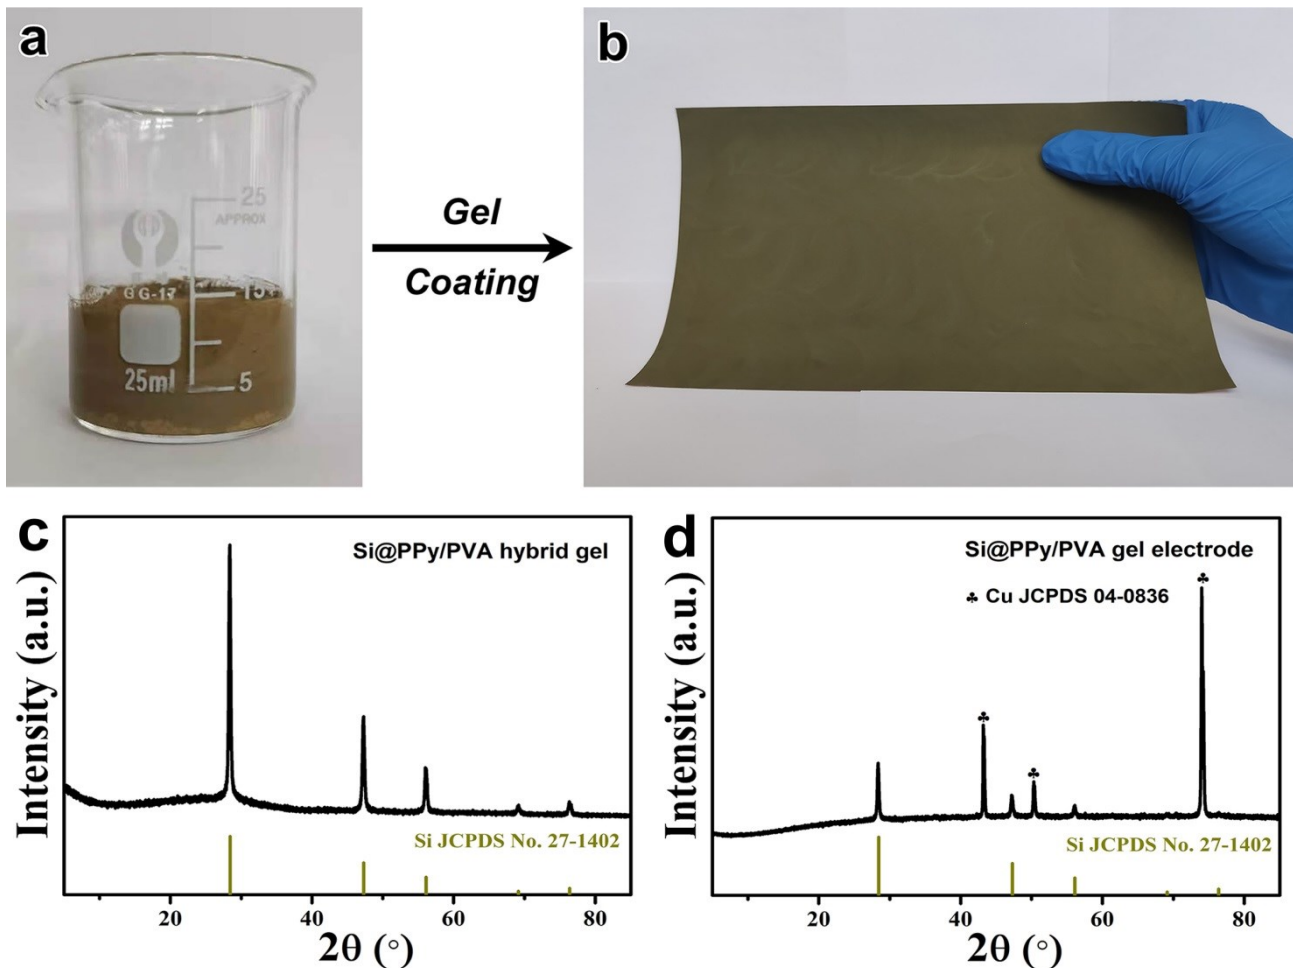

**Fig. S12** The Si@PPy/PVA hybrid gel (a) has been spread on copper foil current collectors, yielding the Si@PPy/PVA gel electrode (b). XRD patterns of the Si@PPy/PVA hybrid gel (c) and Si@PPy/PVA gel electrode (d).

Fig. S12c and d reveal the XRD patterns of the Si@PPy/PVA hybrid gel and Si@PPy/PVA gel electrode. The characteristic diffraction peaks corresponding to cubic Si (JCPDS no. 27-1402) can be observed from both the patterns of the hybrid gel and gel electrode, whereas the PPy/PVA interpenetrating gel is amorphous in nature. Moreover, for the Si@PPy/PVA gel electrode, the additional diffraction peaks can be indexed to cubic Cu, which originate from copper foil current collectors.

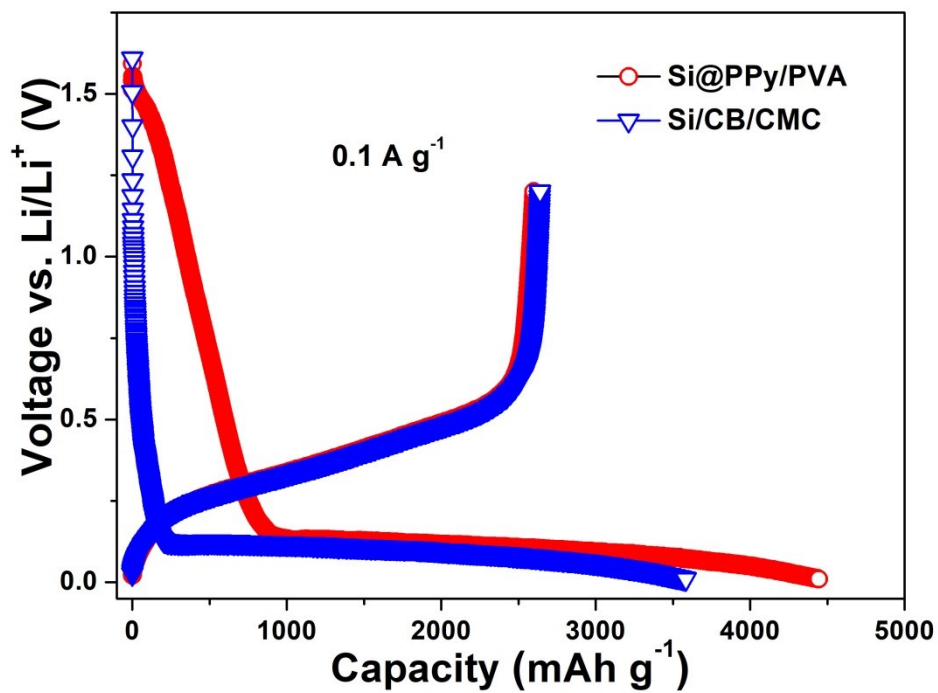

**Fig. S13** The initial discharge and charge curves for the Si@PPy/PVA gel electrode in comparison with conventional electrode.



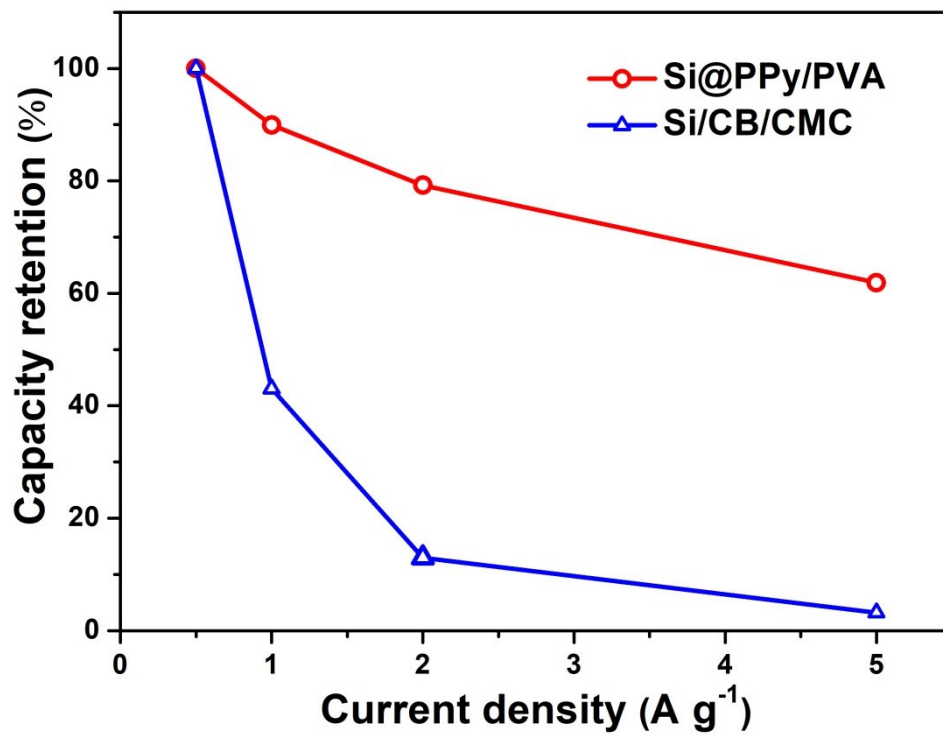

**Fig. S14** Rate retention for the Si@PPy/PVA gel electrode in comparison with conventional electrode.

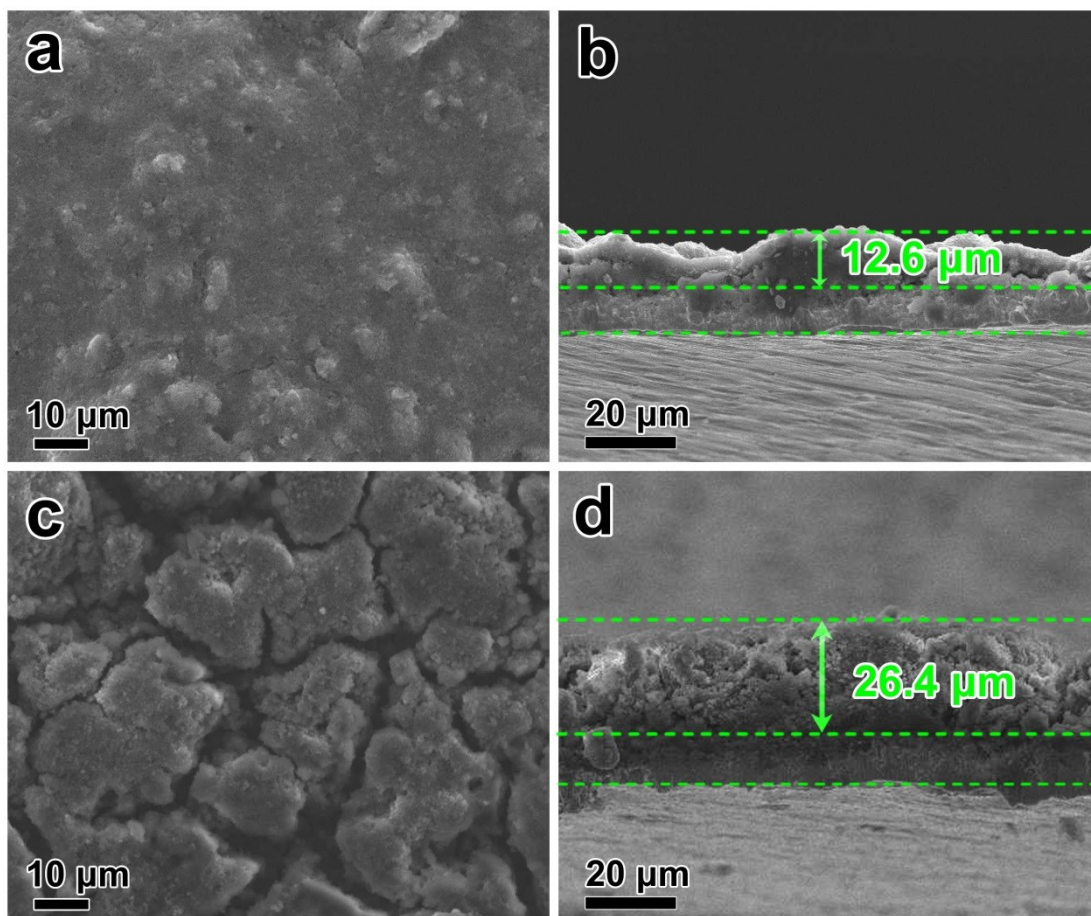

**Fig. S15** Top and cross-sectional SEM images of the Si/CB/CMC conventional electrode before cycling (a, b) and after 100 cycles (c, d).

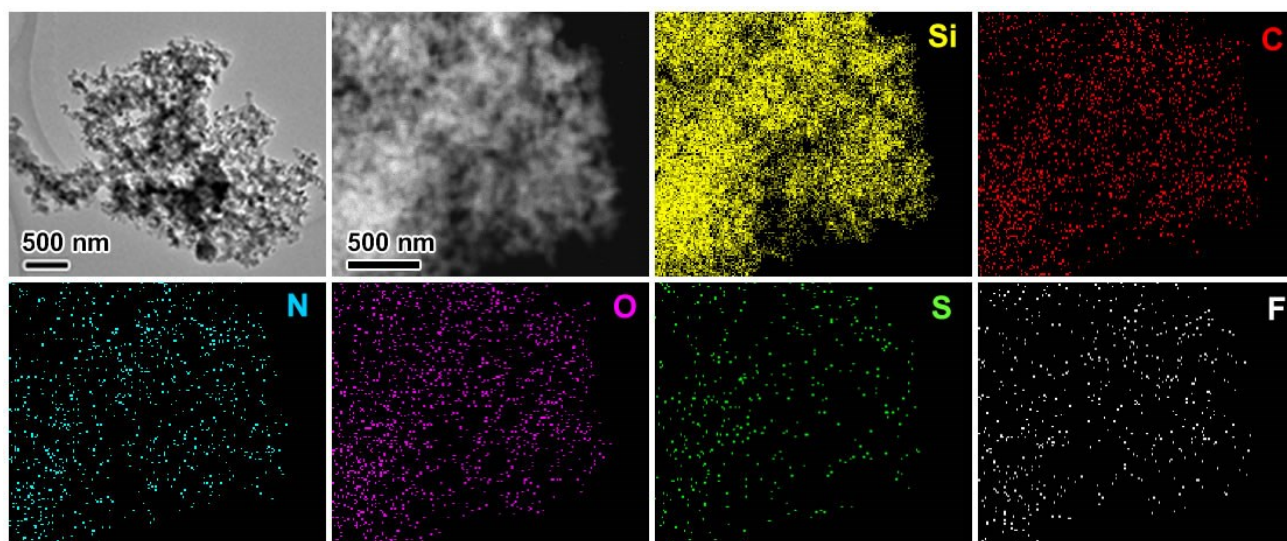

**Fig. S16** TEM image and STEM-EDS elemental mappings of the Si@PPy/PVA gel electrode in a fully de-lithiated state (1.2 V vs.  $\text{Li}^+/\text{Li}$ ) after 100 cycles.

**Table S1** Comparison of the cycling stability and rate capability of the Si@PPy/PVA gel electrode with recently reported Si@polymer network electrodes.

| Anode materials                                                  | Cycling stability (mAh g <sup>-1</sup> )         | Rate capability (mAh g <sup>-1</sup> )                            | Ref              |
|------------------------------------------------------------------|--------------------------------------------------|-------------------------------------------------------------------|------------------|
| <b>Si@PPy/PVA gel electrode</b>                                  | <b>1834 at 0.5 A g<sup>-1</sup> (100 cycles)</b> | <b>1975 at 2 A g<sup>-1</sup><br/>1543 at 5 A g<sup>-1</sup></b>  | <b>This work</b> |
| Si@CB/dextrin-GA electrode                                       | ~1430 at 0.42 A g <sup>-1</sup> (100 cycles)     | ~1227 at 4.2 A g <sup>-1</sup>                                    | 1                |
| Si@CB/p(AA <sub>70</sub> -co-nBA <sub>30</sub> )-PEGDE electrode | 1220 at 0.5 A g <sup>-1</sup> (100 cycles)       | ~1800 at 1 A g <sup>-1</sup>                                      | 2                |
| Si@CB/PMDOPA electrode                                           | ~1580 at 0.84 A g <sup>-1</sup> (100 cycles)     | ~1530 at 2.1 A g <sup>-1</sup><br>~1400 at 4.2 A g <sup>-1</sup>  | 3                |
| Si/PEDOT:PSS electrode                                           | 1950 at 1 A g <sup>-1</sup> (100 cycles)         | ~1580 at 5 A g <sup>-1</sup>                                      | 4                |
| Si@CB/CMC-MAH electrode                                          | ~1070 at 1 A g <sup>-1</sup> (100 cycles)        | 535 at 2 A g <sup>-1</sup>                                        | 5                |
| Si@CB/HPAM electrode                                             | 1639 at 0.358 A g <sup>-1</sup> (100 cycles)     | NA                                                                | 6                |
| Si@CB/CS-GA electrode                                            | ~1940 at 0.5 A g <sup>-1</sup> (100 cycles)      | ~1950 at 2 A g <sup>-1</sup>                                      | 7                |
| Si@PANI/PAA electrode                                            | ~2350 at 0.84 A g <sup>-1</sup> (100 cycles)     | ~1360 at 3.36 A g <sup>-1</sup><br>~590 at 6.72 A g <sup>-1</sup> | 8                |
| Si@CB/PAA-SA electrode                                           | ~1005 at 0.2 A g <sup>-1</sup> (100 cycles)      | 1632 at 0.8 A g <sup>-1</sup>                                     | 9                |
| Si@CB/ppSA-ppCMC electrode                                       | ~2080 at 0.5 A g <sup>-1</sup> (100 cycles)      | 1720 at 2 A g <sup>-1</sup><br>1225 at 5 A g <sup>-1</sup>        | 10               |

## References

- (1) S. Chen, H. Y. Ling, H. Chen, S. Zhang, A. Du and C. Yan, *J. Power Sources*, 2020, **450**, 227671.
- (2) J. Son, T. N. Vo, S. Cho, A. N. Preman, I. T. Kim and S. Ahn, *J. Power Sources*, 2020, **458**, 228054.
- (3) D. Yao, J. Feng, J. Wang, Y. Deng and C. Wang, *J. Power Sources*, 2020, **463**, 228188.
- (4) T. M. Higgins, S. H. Park, P. J. King, C. Zhang, N. McEvoy, N. C. Berner, D. Daly, A. Shmeliov, U. Khan, G. Duesberg, V. Nicolosi and J. N. Coleman, *ACS Nano*, 2016, **10**, 3702–3713.
- (5) P. Li, G. Chen, Y. Lin, F. Chen, L. Chen, N. Zhang, Y. Cao, R. Ma and X. Liu, *Macromol. Chem. Phys.*, 2020, **221**, 1900414.
- (6) A. Miranda, X. Li, A. M. Haregewoin, K. Sarang, J. Lutkenhaus, R. Kostecki and R. Verduzco, *ACS Appl. Mater. Interfaces*, 2019, **11**, 44090–44100.
- (7) C. Chen, S. H. Lee, M. Cho, J. Kim and Y. Lee, *ACS Appl. Mater. Interfaces*, 2016, **8**, 2658–2665.
- (8) X. Wang, Y. Zhang, Y. Shi, X. Zeng, R. Tang and L. Wei, *Ionics*, 2019, **25**, 5323–5331.
- (9) L. Zhu, F. Du, Y. Zhuang, H. Dai, H. Cao, J. Adkins, Q. Zhou and J. Zheng, *J. Electroanal. Chem.*, 2019, **845**, 22–30.
- (10) R. Guo, S. Zhang, H. Ying, W. Yang, J. Wang and W. Han, *ChemSusChem*, 2019, **12**, 4838–4845.
